# Supplementary material for: An all-solid-state potentiometric microsensor for real-time monitoring of the calcification process byBacillus subtilisbiofilms
Source: Royal Society of Chemistry journal article supplement (doi:10.1039/d3sd00017f), 2023-01-01
Supplement: d3sd00017f1.pdf [file d3sd00017f1.pdf]

## Supporting Information

### **An all-solid-state potentiometric microsensor for real-time monitoring of the calcification process by *Bacillus subtilis* biofilm**

Jiabin Wang,<sup>ab</sup> Jiawang Ding,<sup>\*abcd</sup> and Wei Qin<sup>abcd</sup>

<sup>a</sup> CAS Key Laboratory of Coastal Environmental Processes and Ecological Remediation; Shandong Key Laboratory of Coastal Environmental Processes, YICCAS, Yantai Institute of Coastal Zone Research (YIC), Chinese Academy of Sciences (CAS), Yantai 264003, Shandong (P. R. China)

<sup>b</sup> University of Chinese Academy of Sciences, Beijing 100049 (P. R. China)

<sup>c</sup> Center for Ocean Mega-Science, Chinese Academy of Sciences Center for Ocean Mega-Science, Chinese Academy of Sciences, Qingdao 266071, Shandong (P. R. China)

<sup>d</sup> Laboratory for Marine Biology and Biotechnology, Pilot National Laboratory for Marine Science and Technology (Qingdao), Qingdao 266237, Shandong (P. R. China)

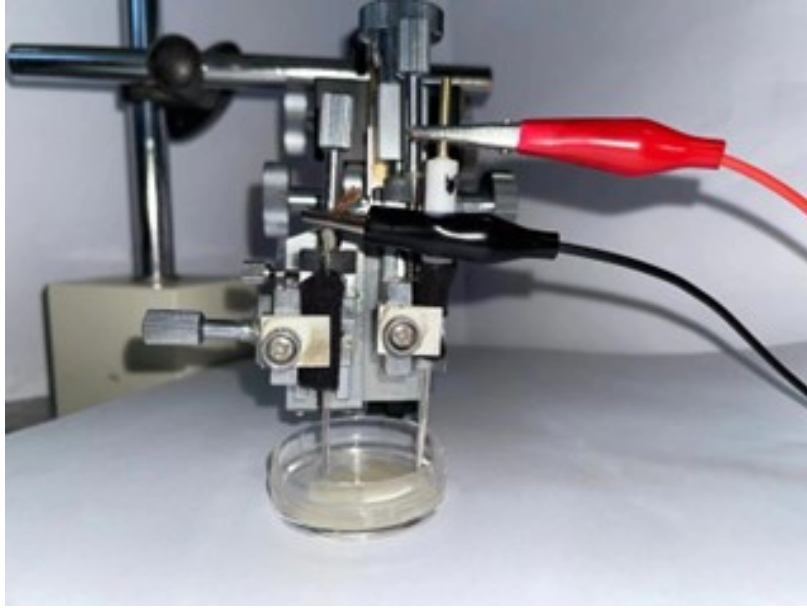

**Fig. S1** The photograph of the setup for *in situ* detection of the calcification process by *Bacillus subtilis* biofilm.

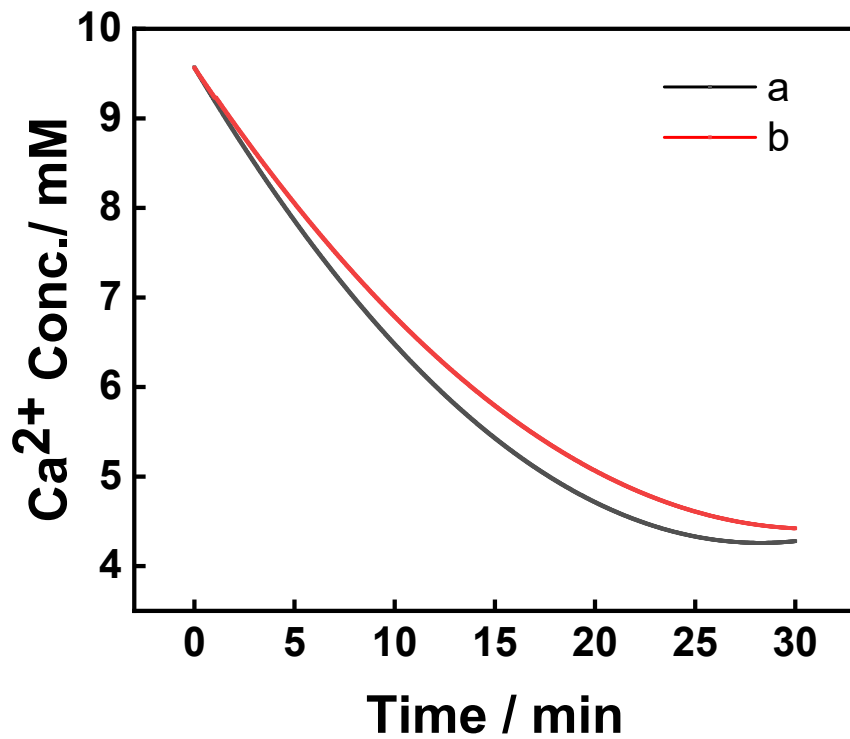

**Fig. S2** Different measurements of *Bacillus subtilis* biofilms in Ca<sup>2+</sup> concentration due to calcification over a half-hour period (The curve a and b). The sensor was held at 200  $\mu$ m above the biofilm during the measurement.
